# Supplementary material
Source: PubMed Central journal article supplement (PMC6331729)

3A

WB:BAK

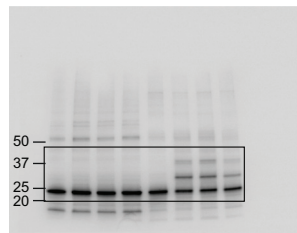

3B

WB: Parkin

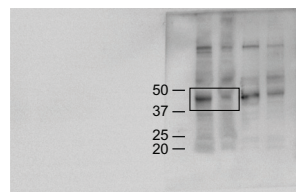

3C

WB: BAK

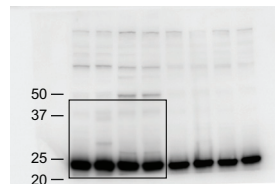WB: BAK  
(Long exp.)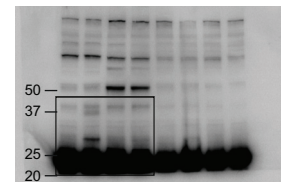

3D

WB: BAK

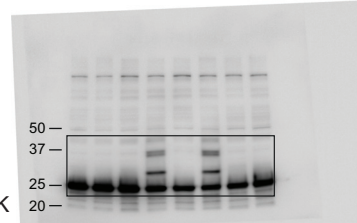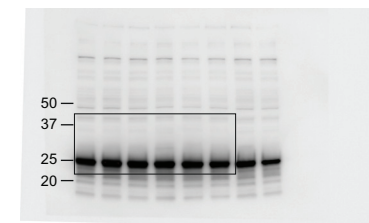

WB:VDAC1

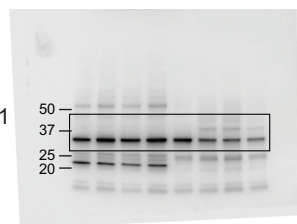

WB: HSP70

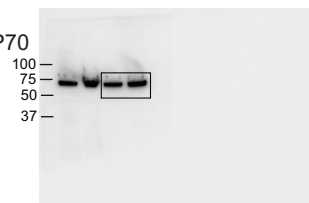

WB: MFN2

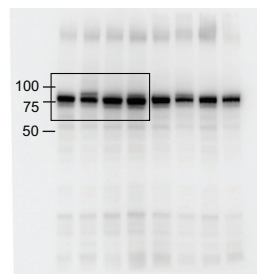

WB: VDAC1

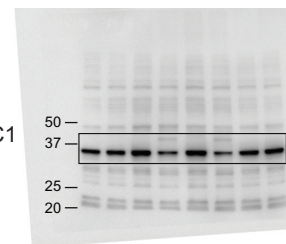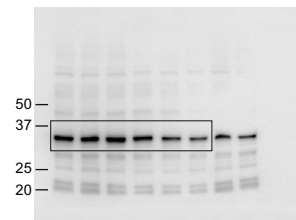WB:MFN2  
(reprobe)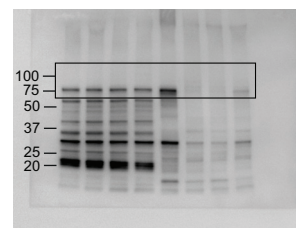WB: MFN2  
(reprobe)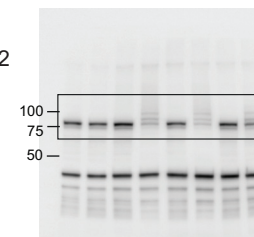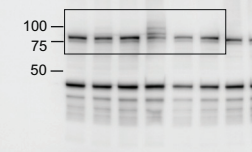WB:Parkin  
(reprobe)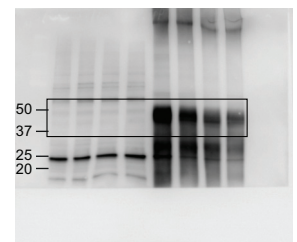

WB: Parkin

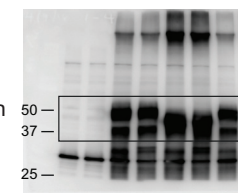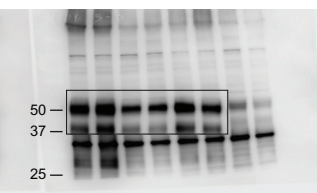

WB:TIMM44

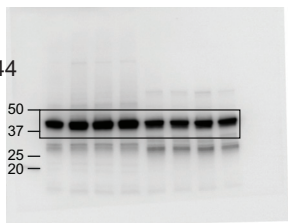WB: VDAC1  
(reprobe)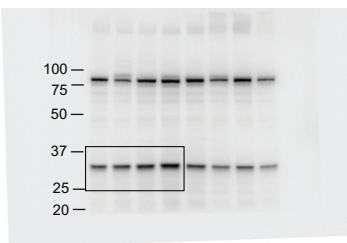

WB: TIMM44

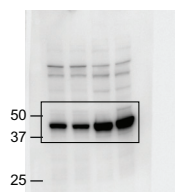WB: GAPDH  
(reprobe)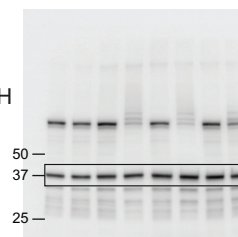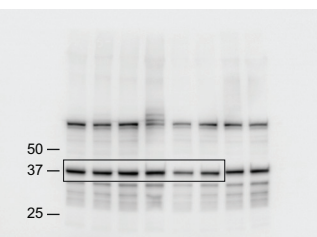

Supplement: EMBJ-38-e99916-s005.pdf [file EMBJ-38-e99916-s005.pdf]
