# Supplementary material
Source: PubMed Central journal article supplement (PMC6331729)

1C

WB: Cyt c

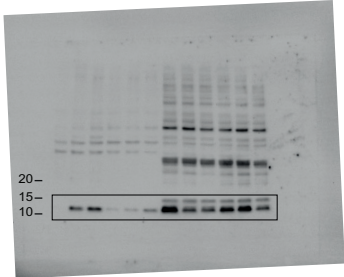

1D

WB: Cyt c

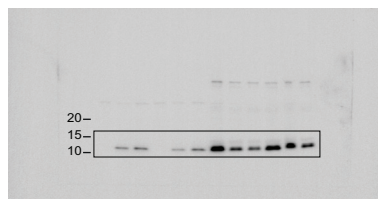

1E

WB: BAX

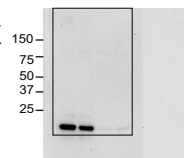

WB: BAX

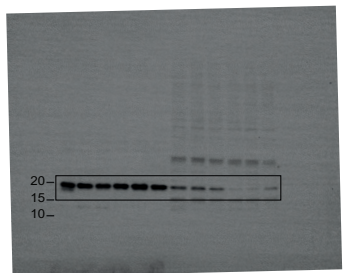

WB: BAX

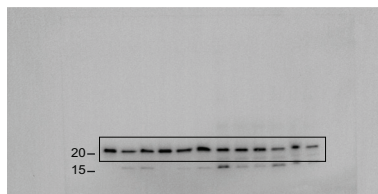

WB: MFN2

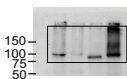

WB: Ub

(BAX reprobe)

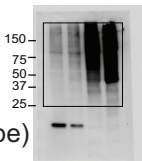

WB: VDAC2

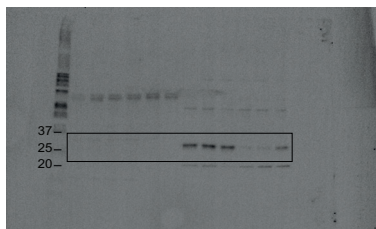

WB: VDAC1

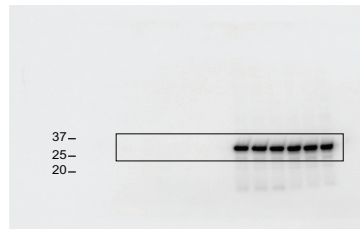

WB: TIMM44

WB: GAPDH

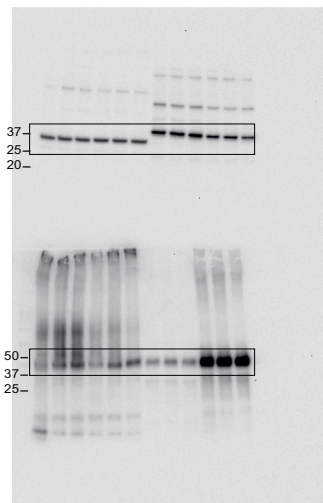

WB: TIMM44

WB: GAPDH

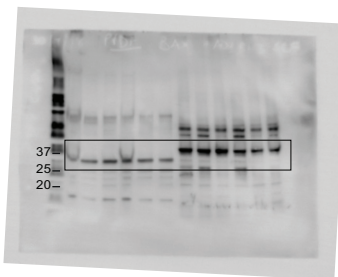

WB: Parkin

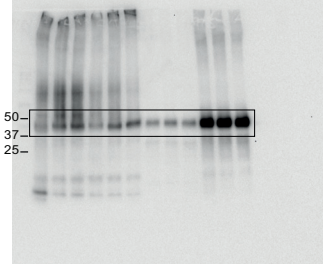

Supplement: EMBJ-38-e99916-s003.pdf [file EMBJ-38-e99916-s003.pdf]
