# Supplementary material
Source: PubMed Central journal article supplement (PMC6331729)

2A

WB: BAK

WB: BAX

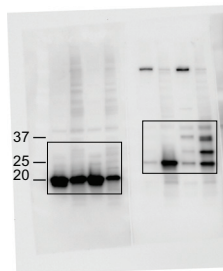

WB: Parkin

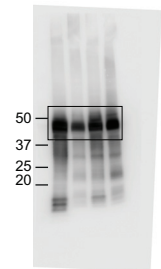WB: TIMM44  
WB: GAPDH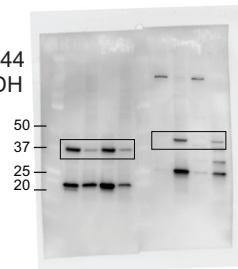

2B

WB: BAK

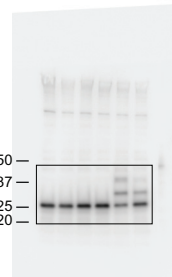

WB: MFN2

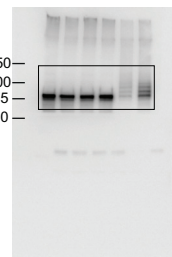

WB: VDAC2

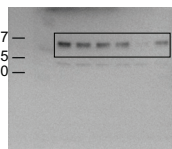

WB: TIMM44

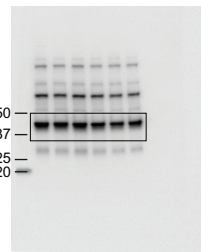

WB: Parkin

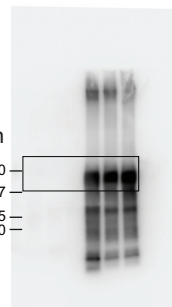

2C

WB: BAK

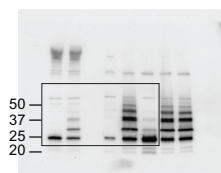

WB: VDAC1

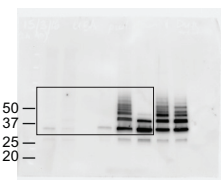

WB: VDAC2

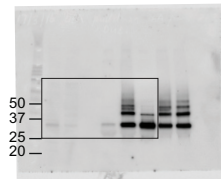

2E

WB: VDAC1

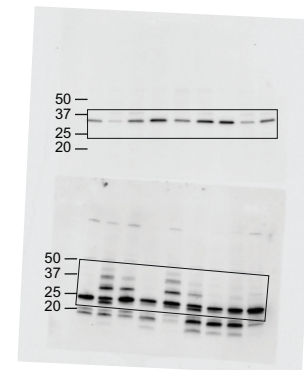

WB: BAK

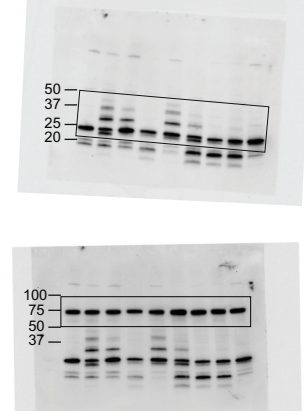WB: HSP70  
(reprobe)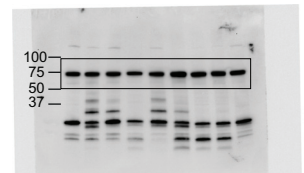

Supplement: EMBJ-38-e99916-s004.pdf [file EMBJ-38-e99916-s004.pdf]
