# Supplementary material
Source: PubMed Central journal article supplement (PMC6331729)

4A

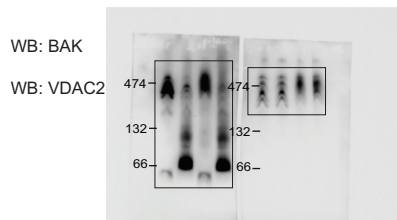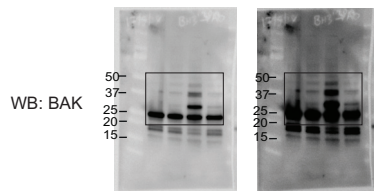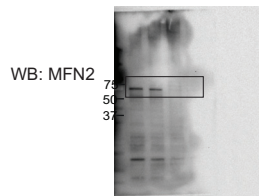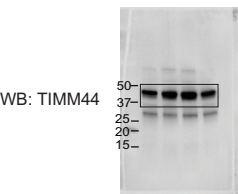

4B

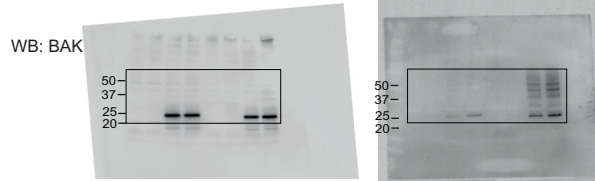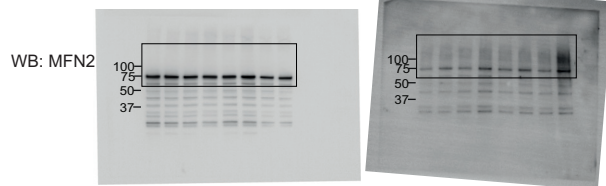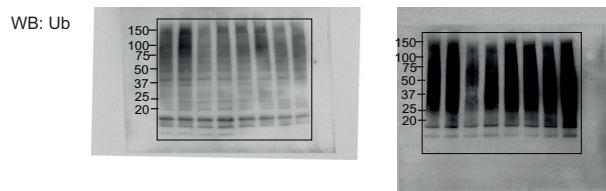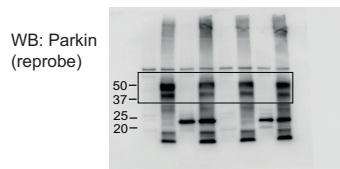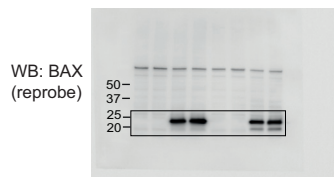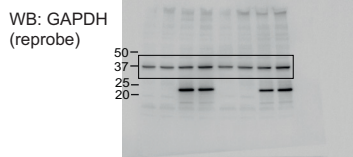

4C

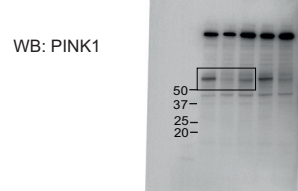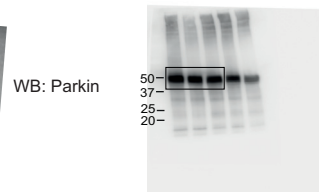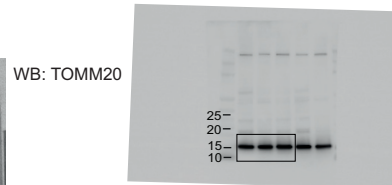

4D

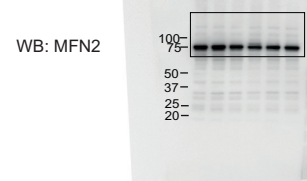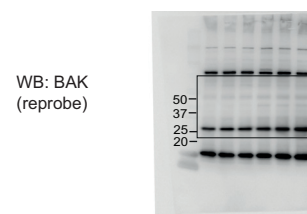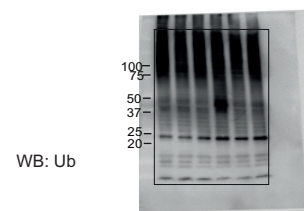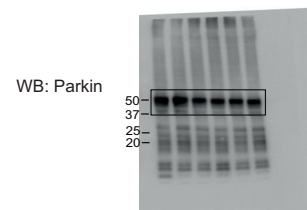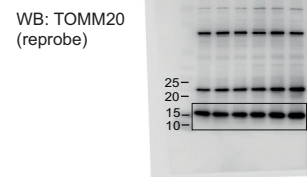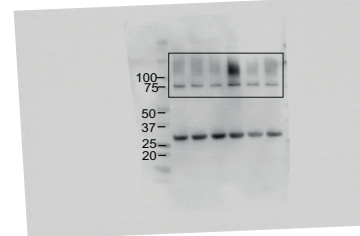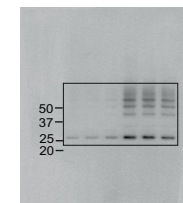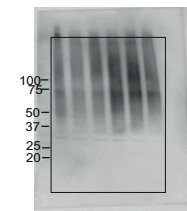

Supplement: EMBJ-38-e99916-s006.pdf [file EMBJ-38-e99916-s006.pdf]

# Fig 5

5B

WB: BAK

37  
25  
20  
15

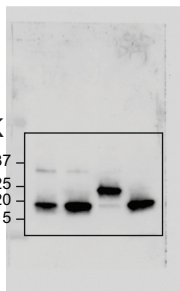

5D

WB: BAK

474  
132  
66

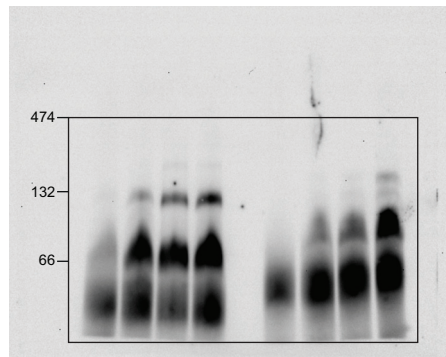

WB: BAK

474  
132  
66

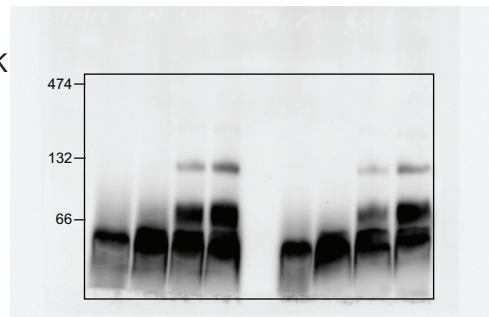

Supplement: EMBJ-38-e99916-s007.pdf [file EMBJ-38-e99916-s007.pdf]

# Fig 6

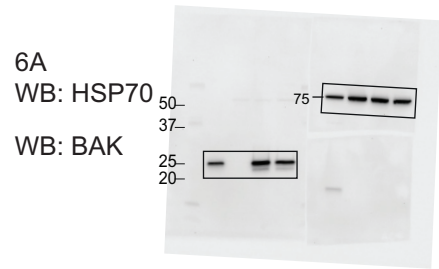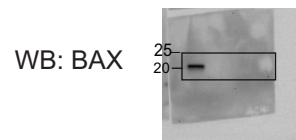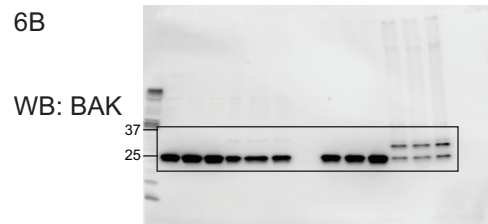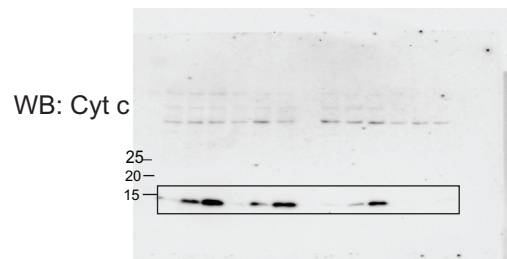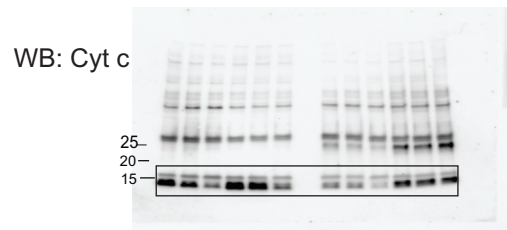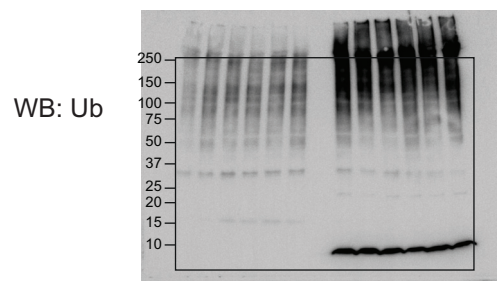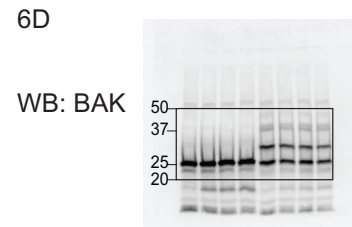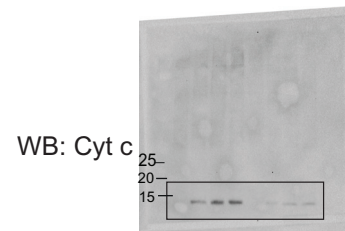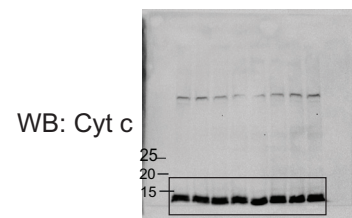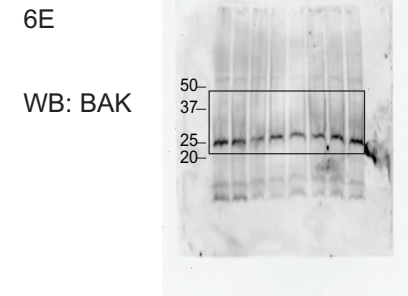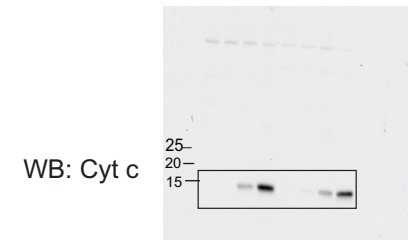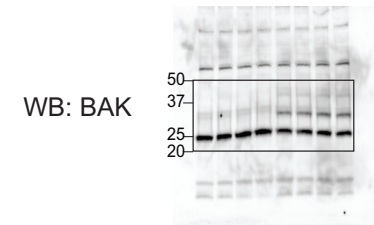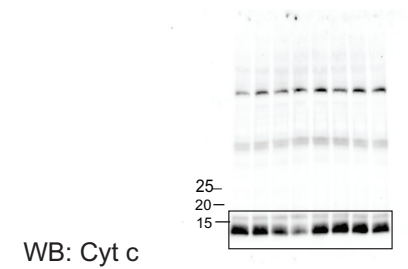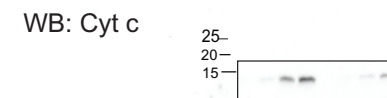

Supplement: EMBJ-38-e99916-s008.pdf [file EMBJ-38-e99916-s008.pdf]
